# Supplementary material for: Carbon Microtube Textile with MoS2 Nanosheets Grown on Both Outer and Inner Walls as Multifunctional Interlayer for Lithium–Sulfur Batteries
Source: PubMed Central journal article supplement (PMC7610341; doi:10.1002/advs.201903260), 2020-09-27
Supplement: ADVS-7-1903260-s001.pdf [file ADVS-7-1903260-s001.pdf]

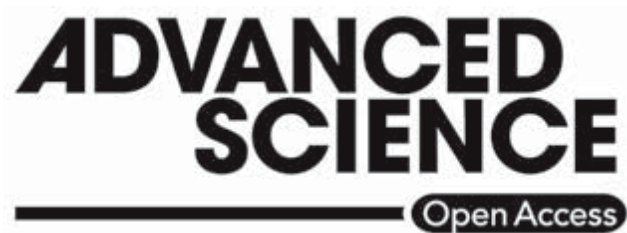

## Supporting Information

for *Adv. Sci.*, DOI: 10.1002/adv.201903260

**Carbon Microtube Textile with MoS<sub>2</sub> Nanosheets Grown on Both Outer and Inner Walls as Multifunctional Interlayer for Lithium-Sulfur Batteries**

*Jiaye Yang, Lihong Yu, Bangbei Zheng, Narui Li, Jingyu Xi and Xinpeng Qiu*

*This file includes:*

Figure S1-S16, Table S1-S2 and references.

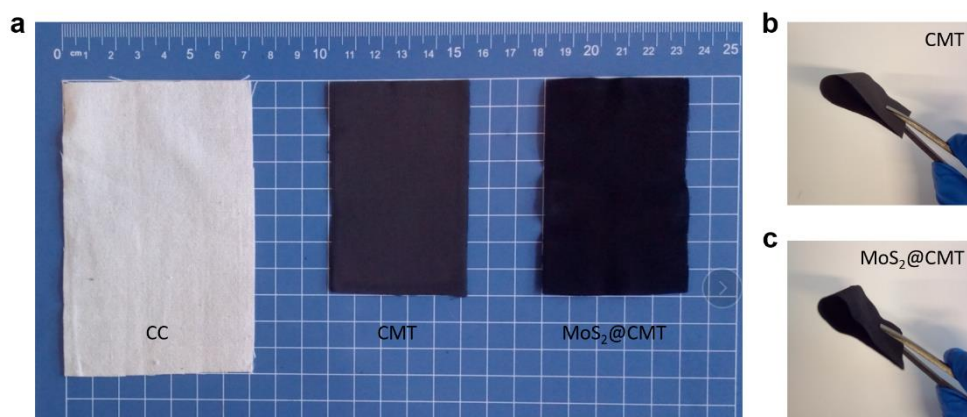

**Figure S1.** Macro-morphology evolution. (a) Photograph of CC, CMT and MoS<sub>2</sub>@CMT, (b-c) flexible feature of CMT and MoS<sub>2</sub>@CMT.

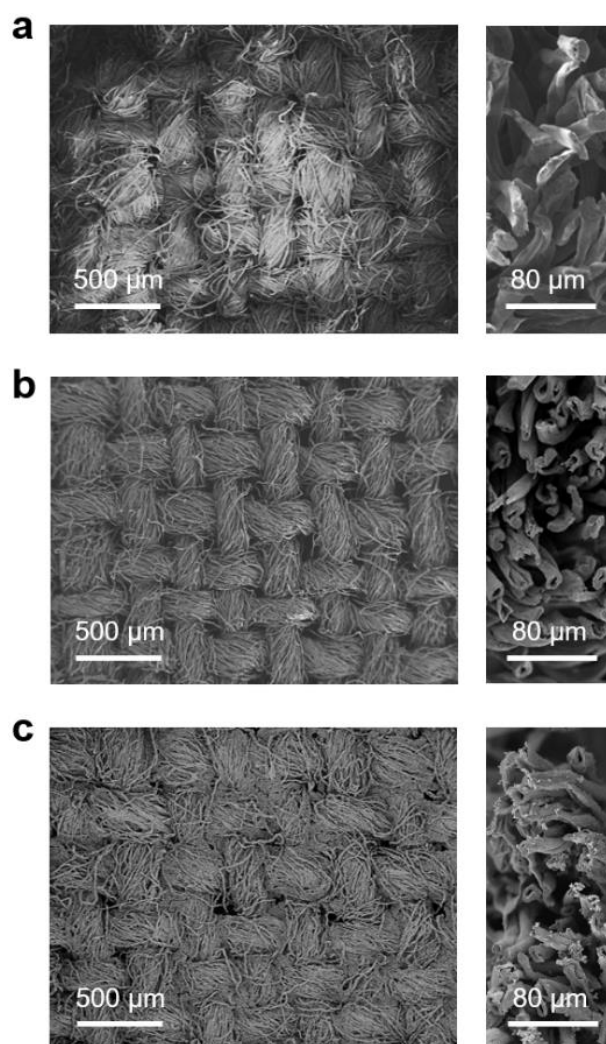

**Figure S2.** Micro-morphology evolution. Surface (left) and cross-sectional (right) SEM images of (a) CC, (b) CMT, and (c) MoS<sub>2</sub>@CMT.

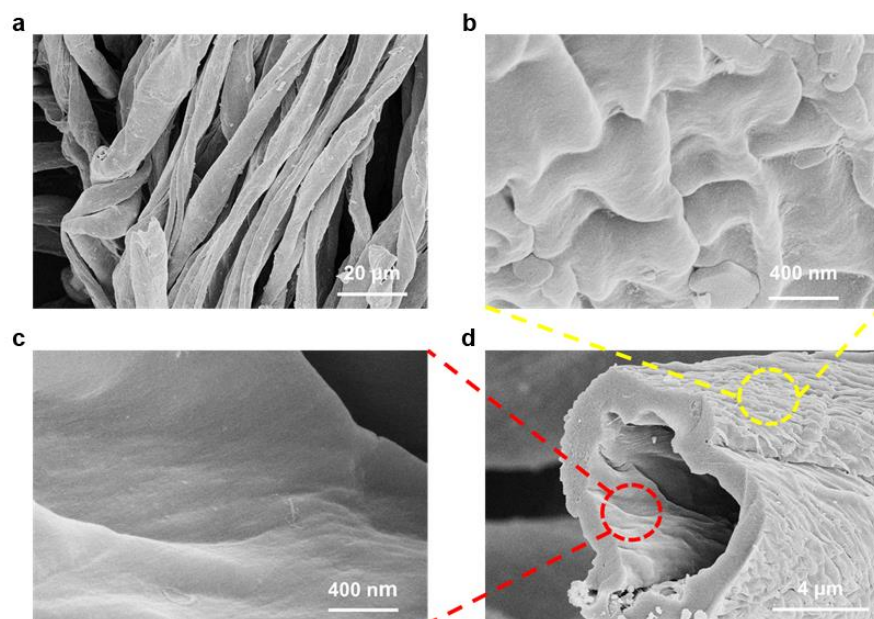

**Figure S3.** SEM images of CMT. (a) Low- magnification, (b) outside surface, (c) internal surface, (d) cross-section.

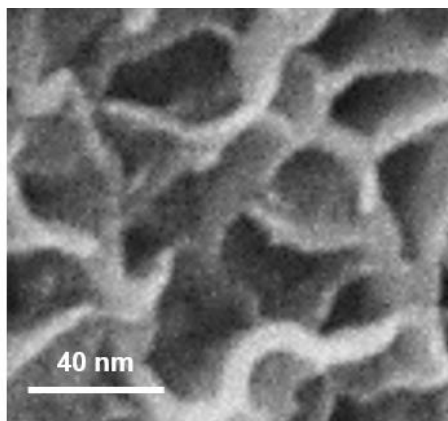

**Figure S4.** SEM image of MoS<sub>2</sub>@CMT with high magnification.

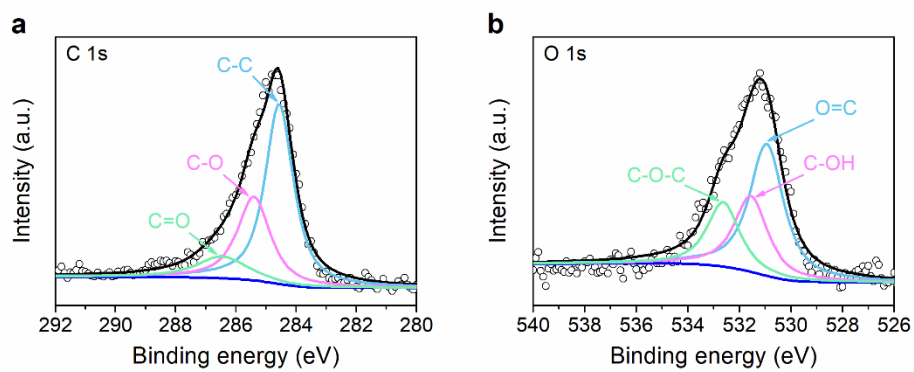

**Figure S5.** High-resolution XPS spectrum of MoS<sub>2</sub>@CMT. (a) C 1s, (b) O 1s.

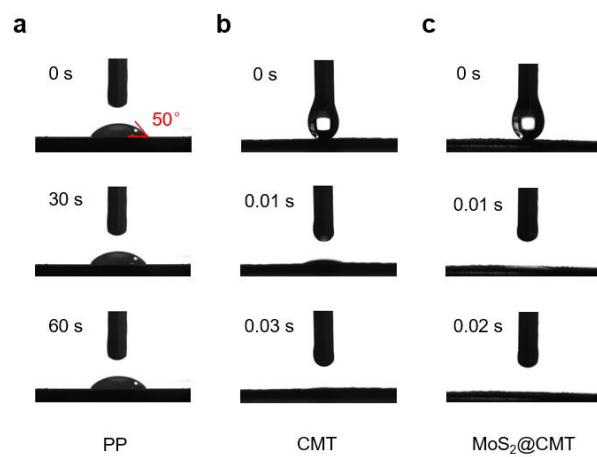

**Figure S6.** Electrolyte contact angle of (a) PP, (b) CMT, and (c) MoS<sub>2</sub>@CMT.

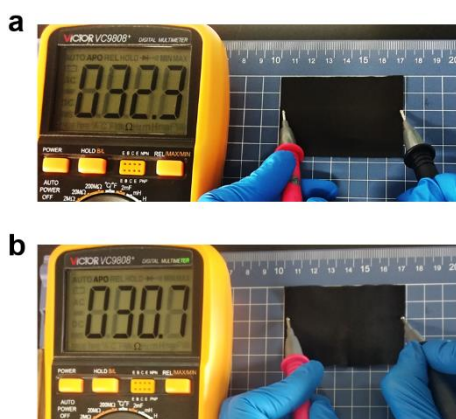

**Figure S7.** Photographs of the resistance measurement of (a) CMT and (b) MoS<sub>2</sub>@CMT.



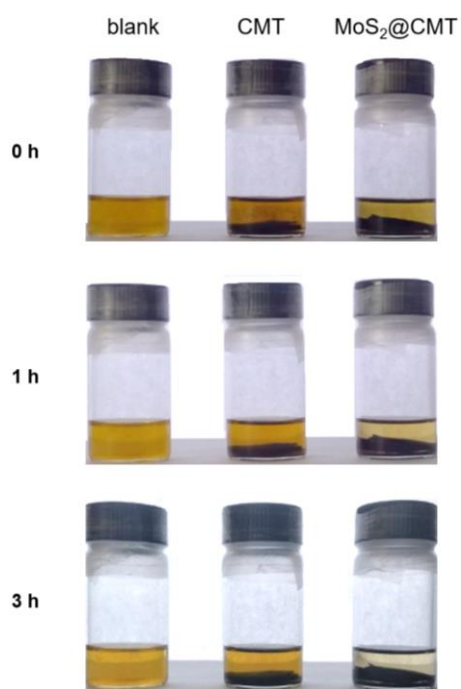

**Figure S8.** The images of the adsorption capability of CMT and MoS<sub>2</sub>@CMT towards Li<sub>2</sub>S<sub>6</sub>.

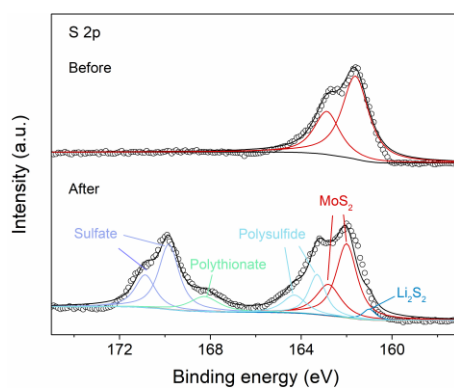

**Figure S9.** Comparison of the S 2p XPS peaks of MoS<sub>2</sub>@CMT before and after Li<sub>2</sub>S<sub>6</sub> adsorption.

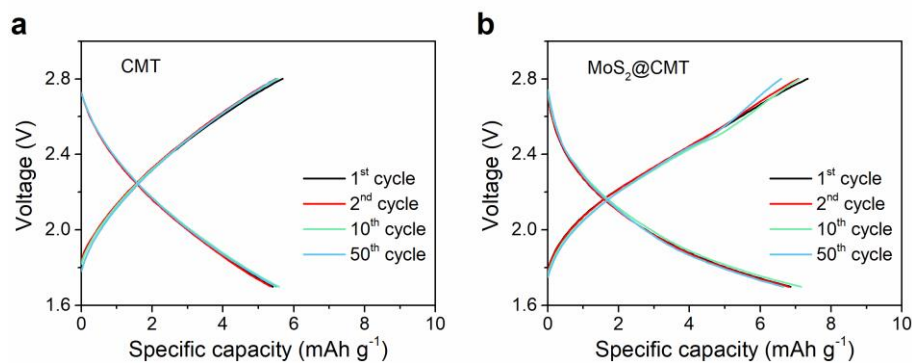

**Figure S10.** Charge/discharge profiles of (a) CMT and (b) MoS<sub>2</sub>@CMT without sulfur loading.

Pure lithium foil and Celgard 2400 separator were used as the anode and separator, respectively. The CMT or MoS<sub>2</sub>@CMT interlayer (with a diameter of 19 mm) was used as the cathode. 1 M LiTFSI and 1 wt. % LiNO<sub>3</sub> in DOL and DME solution (1:1 by volume) was used as the electrolyte. The volume of the electrolyte used in each battery was 80  $\mu$ L. Galvanostatic charge/discharge was carried out in the voltage window of 1.7-2.8 V at a current density of 0.5 C (corresponding to the current of LSB with 1 mg cm<sup>-2</sup> of S loading).

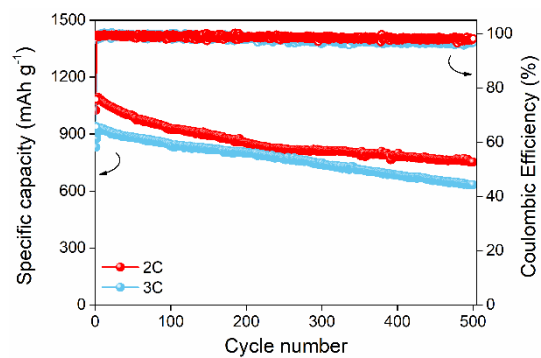

**Figure S11.** The cyclability of the Li-S batteries with MoS<sub>2</sub>@CMT interlayer at 2 and 3 C rates.

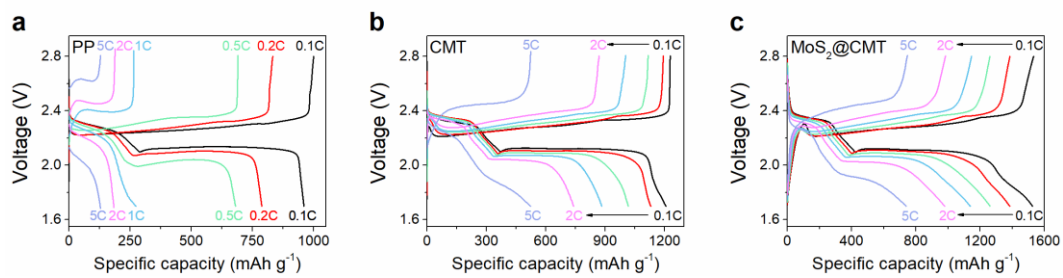

**Figure S12.** Charge/discharge profiles of the Li-S batteries employing (a) PP separator, (b) CMT interlayer, and (c) MoS<sub>2</sub>@CMT interlayer at different rates.

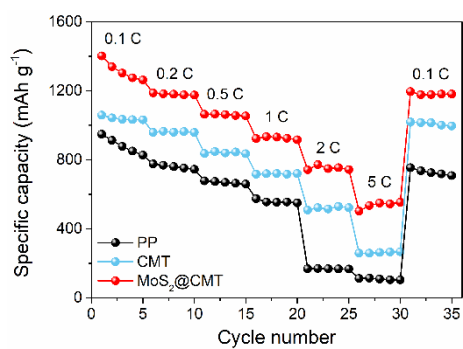

**Figure S13.** The rate performances of PP separator, CMT interlayer and MoS<sub>2</sub>@CMT interlayer under the sulfur loading of 2 mg cm<sup>-2</sup>.

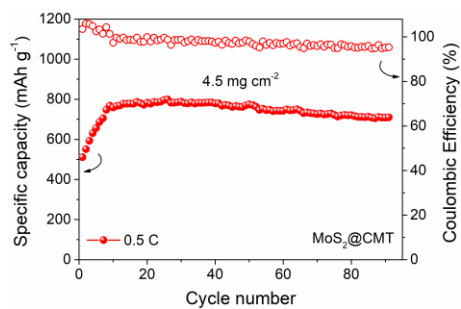

**Figure S14.** The cyclability of the Li-S battery with MoS<sub>2</sub>@CMT interlayer at 0.5 C with a high sulfur loading of 4.5 mg cm<sup>-2</sup>.

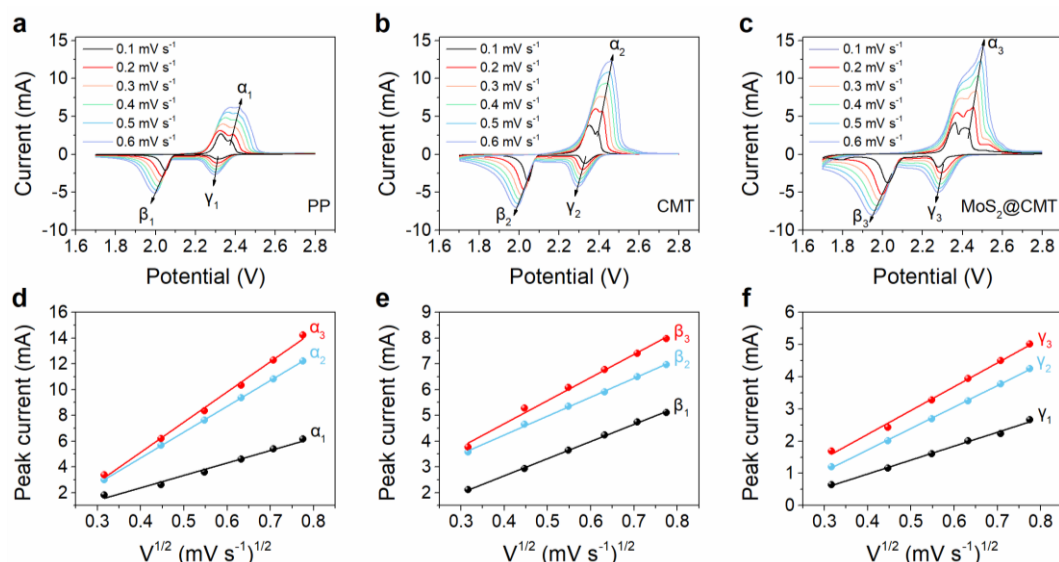

**Figure S15.** Cyclic voltammetry curves and the linear relationship of the peak current ( $i_p$ ) vs. the square root of the scan rate ( $v^{1/2}$ ) for PP separator (a, d), CMT interlayer (b, e) and MoS<sub>2</sub>@CMT (c, f) interlayer at various scanning rates between 1.7 and 2.8 V.

The peak current ( $I_p$ ) and the square root of the scan rate ( $v^{0.5}$ ) exhibit a linear relationship, which reflects a diffusion-controlled process. PP-, CMT- and MoS<sub>2</sub>@CMT-based LSBs are tested under the same conditions for comparison. The anodic peak ( $\alpha$ ) refers to the reaction from Li<sub>2</sub>S<sub>2</sub>/Li<sub>2</sub>S to high-order Li<sub>2</sub>S<sub>x</sub> ( $4 \leq x \leq 8$ ) and, finally, to S<sub>8</sub>. On the other hand, the cathodic peak ( $\gamma$ ), located at  $\sim 2.35$  V, is related to the reduction from S<sub>8</sub> to soluble Li<sub>2</sub>S<sub>x</sub> ( $4 \leq x \leq 8$ ). The other cathodic peak ( $\beta$ ) is located at  $\sim 2.05$  V, which is associated with a further reduction of high-order polysulfide to Li<sub>2</sub>S<sub>2</sub>/Li<sub>2</sub>S.



**Table S1.** The comparison of electrochemical performance and relevant parameters of this work with other similar reports in the literatures about the interlayers at 0.5C rate for 100 cycles.

| Composition                        | Sulfur loading<br>(mg cm <sup>-2</sup> ) | Sulfur content<br>(%) | Remaining<br>capacity<br>(mAh g <sup>-1</sup> ) | Capacity decay<br>per cycle<br>(%) | Ref.      |
|------------------------------------|------------------------------------------|-----------------------|-------------------------------------------------|------------------------------------|-----------|
| MoS <sub>2</sub> @NC               | 1.2                                      | 60                    | 880.0                                           | 0.196                              | [1]       |
| 3D MoS <sub>2</sub>                | 1.2                                      | 60                    | 941.0                                           | 0.144                              | [2]       |
| PEO/PAA                            | 1.0                                      | 60                    | 806.0                                           | 0.232                              | [3]       |
| SiO <sub>2</sub> @MoS <sub>2</sub> | 1.2                                      | 60                    | 876.0                                           | 0.193                              | [4]       |
| NCF                                | 1.2                                      | 70                    | 902.8                                           | 0.197                              | [5]       |
| CNFO@CNT                           | 1.0                                      | 60                    | 869.0                                           | 0.223                              | [6]       |
| CCC                                | 1.0                                      | 60                    | 818.5                                           | 0.153                              | [7]       |
| MoS <sub>2</sub> @CMT              | 1.0                                      | 60                    | 1093.4                                          | 0.085                              | This work |

**Table S2.** Li<sup>+</sup> diffusion coefficients ( $D_{Li^+}$ ) of batteries with different configurations calculated from the Randles-Sevcik equation.

| Sample                | $D_{Li^+}$ at peak $\alpha$<br>[cm <sup>2</sup> s <sup>-1</sup> ] | $D_{Li^+}$ at peak $\beta$<br>[cm <sup>2</sup> s <sup>-1</sup> ] | $D_{Li^+}$ at peak $\gamma$<br>[cm <sup>2</sup> s <sup>-1</sup> ] |
|-----------------------|-------------------------------------------------------------------|------------------------------------------------------------------|-------------------------------------------------------------------|
| PP                    | $1.26 \times 10^{-10}$                                            | $5.99 \times 10^{-11}$                                           | $2.52 \times 10^{-11}$                                            |
| CMT                   | $5.43 \times 10^{-10}$                                            | $7.29 \times 10^{-11}$                                           | $6.00 \times 10^{-11}$                                            |
| MoS <sub>2</sub> @CMT | $7.44 \times 10^{-10}$                                            | $1.09 \times 10^{-10}$                                           | $7.39 \times 10^{-11}$                                            |

### Li<sup>+</sup> diffusion coefficient ( $D_{Li^+}$ ):

$D_{Li^+}$  was calculated through the Randles-Sevcik equation:

$$i_p = 2.69 \times 10^5 n^{3/2} A D^{1/2} \nu^{1/2} \Delta C_0$$

in which  $i_p$  is the peak current (mA),  $n$  is the number of electrons transferred in the reaction (for Li-S batteries,  $n=2$ ),  $A$  is the electrode area (cm<sup>2</sup>),  $D$  is the Li<sup>+</sup> diffusion coefficient (cm<sup>2</sup> s<sup>-1</sup>),  $\Delta C_0$  is the change of Li<sup>+</sup> concentration (mol cm<sup>-3</sup>), and  $\nu$  is the scan rate.

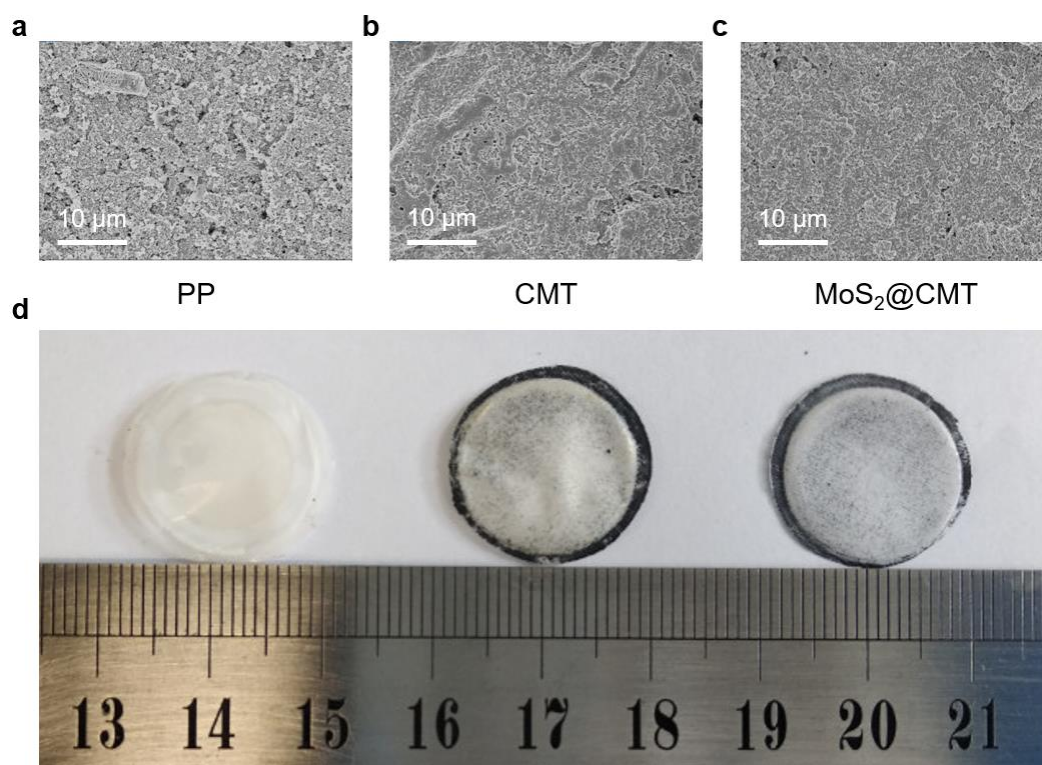

**Figure S16.** The analysis of the batteries after cycling at 0.5 C for 500 cycles. Surface SEM images of the cathodes removed from the Li-S batteries using: (a) PP separator, (b) CMT interlayer, and (c) MoS<sub>2</sub>@CMT interlayer. (d) Photograph of the corresponding PP separators.

**References**

- [1] J. Y. Wu, X. W. Li, H. X. Zeng, Y. Xue, F. Y. Chen, Z. G. Xue, Y. S. Ye, X. L. Xie, *J. Mater. Chem. A* **2019**, *7*, 7897.
- [2] J. Y. Wu, H. X. Zeng, X. W. Li, H. J. Pei, Z. G. Xue, Y. S. Ye, X. L. Xie, *ACS Appl. Energy. Mater* **2019**, *2*, 1702.
- [3] E. T. Kim, J. Park, C. Kim, A. G. Simmonds, Y. E. Sung, J. Pyun, K. Char, *ACS Macro. Lett.* **2016**, *5*, 471.
- [4] J. Y. Wu, N. You, X. W. Li, H. X. Zeng, S. Li, Z. G. Xue, Y. S. Ye, X. L. Xie, *J. Mater. Chem. A* **2019**, *7*, 7644.
- [5] Z. X. Cao, J. Zhang, Y. M. Ding, Y. L. Li, M. J. Shi, H. Y. Yue, Y. Qiao, Y. H. Yin, S. T. Yang, *J. Mater. Chem. A* **2016**, *4*, 8636.
- [6] T. Liu, S. M. Sun, J. L. Hao, W. Song, Q. H. Niu, X. L. Sun, Y. Wu, D. P. Song, J. F. Wu, *ACS Appl. Mater. Interfaces* **2019**, *11*, 15607.
- [7] B. B. Zheng, N. R. Li, J. Y. Yang, J. Y. Xi, *Chem. Commun.* **2019**, *55*, 2289.
